# Supplementary material for: The myocardial microvasculature plays a key role in the pathogenesis of feline hypertrophic cardiomyopathy
Source: Research Square preprint supplement (doi:10.21203/rs.3.rs-8465409/v1), 2026-01-14
Supplement: Supplementary file 1 [file f64886d83aa67887eefc2374.docx]

**Supplementary Data**

**Title page**

**The myocardial microvasculature plays a key role in the pathogenesis of feline hypertrophic cardiomyopathy**

Francesco Prisco1,2,*, Andreea Luchian3, Marco Baron Toaldo2,4, Lorenzo Ressel3, Sonja Fonfara2,5, Anja Kipar1,2

Affiliations:

1Institute of Veterinary Pathology, Vetsuisse Faculty, University of Zurich, Switzerland.

2The Veterinary Cardiac Pathophysiology Consortium https://www.vetpathology.uzh.ch/de/forschung/Pathophysiologie-des-Herzens.html

3Department of Veterinary Anatomy Physiology and Pathology, Institute of Infection, Veterinary and Ecological Sciences, University of Liverpool, UK.

4Division of Cardiology, Clinic for Small Animal Medicine, Vetsuisse Faculty, University of Zurich, 8006 Zürich, Switzerland.

5Department of Clinical Studies, Ontario Veterinary College, University of Guelph, 28 College Ave W, Guelph, Ontario N1G 2W1, Canada.

*Correspondence:

Francesco Prisco, Institute of Veterinary Pathology, Vetsuisse Faculty, University of Zurich, Switzerland. Winterthurerstrasse 268, CH-8057 Zurich, Switzerland.

E-Mail: francesco.prisco@uzh.ch; Phone: +41 44 635 85 83

# **Supplementary Tables**

**Supplemental Table S1.** Signalment of cats with HCM (1.1 – 1.4) and control cats without cardiac disease (2.1 – 2.4).

| **Cat** | **Breed** | **Sex** | **Age (years)** |
| --- | --- | --- | --- |
| 1.1 | ESH | FN | 11 |
| 1.2 | ESH | MN | 11 |
| 1.3 | Maine Coon | MN | 1 |
| 1.4 | ESH | MN | 15 |
| 2.1 | DSH | M | 9 |
| 2.2 | DSH | F | 2 |
| 2.3 | DSH | F | 7 |
| 2.4 | DSH | M | 1 |

Legend: DSH _ Domestic shorthair; ESH _ European shorthair; F _ female; FN _ female neutered; M _ male; MN _ male neutered

**Supplemental Table S2**. (A) Accuracy assessment of the convolutional neural network (CNN) used to classify myocardial tissue components. Confusion matrix (in number of pixels) and related performance metrics, including class-wise precision, recall/sensitivity, specificity, and F1-scores, are reported. (B) Summary statistics of the convolutional neural network (CNN) accuracy evaluation detailed in Table A. The model achieved a mean F1-score of 99%, indicating excellent accuracy.

(A)

| **Confusion matrix (pixels)** | | **Predicted classes** | | | |
| --- | --- | --- | --- | --- | --- |
| **Interstitium** | **Vessels** | **Cytoplasm** | **Nuclei** | **Precision** | **Recall/**  **Sensitivity** | **Specificity** | **F1** |
| **Actual classes** | **Interstitium** | 99.390% | 0.237% | 0.313% | 0.061% | 0.997152 | 0.993898 | 0.990965 | 0.995522 |
| **Vessels** | 5.166% | 94.834% | 0.000% | 0.000% | 0.873263 | 0.948336 | 0.99634 | 0.909252 |
| **Cytoplasm** | 0.366% | 0.307% | 99.321% | 0.006% | 0.978814 | 0.993208 | 0.995355 | 0.985959 |
| **Nuclei** | 0.483% | 3.434% | 4.057% | 92.026% | 0.985687 | 0.920258 | 0.999508 | 0.951849 |

(B)

| **Summary statistics** | |
| --- | --- |
| **Accuracy** | 0.989981 |
| **Kappa** | 0.974241 |
| **Mean precision** | 0.990278 |
| **Mean recall/sensitivity** | 0.989981 |
| **Mean specificity** | 0.992187 |
| **Mean F1** | 0.990038 |
